# Supplementary material for: Prognostic value of derived neutrophil-to-lymphocyte ratio (dNLR) in patients with non-small cell lung cancer receiving immune checkpoint inhibitors: a meta-analysis
Source: PubMed Central journal article supplement — BMJ Open. 2021 Sep 2;11(9):e049123. doi: 10.1136/bmjopen-2021-049123 (PMC8413941; doi:10.1136/bmjopen-2021-049123), 2021-09-02
Supplement: bmjopen-2021-049123supp002.pdf [file bmjopen-2021-049123supp002.pdf]

Supplementary Table 1 Search strategies for PubMed, Embase, Cochrane Library and Web of science

| Database                | Keywords                                                                                                                                                                                                                                                                                                                                                                                                                                                                                                                    |
|-------------------------|-----------------------------------------------------------------------------------------------------------------------------------------------------------------------------------------------------------------------------------------------------------------------------------------------------------------------------------------------------------------------------------------------------------------------------------------------------------------------------------------------------------------------------|
| <b>PubMed</b>           |                                                                                                                                                                                                                                                                                                                                                                                                                                                                                                                             |
| #1                      | "Carcinoma, Non-Small-Cell Lung"[Mesh]                                                                                                                                                                                                                                                                                                                                                                                                                                                                                      |
| #2                      | (Carcinoma, Non Small Cell Lung[Title/Abstract]) OR (Carcinomas, Non-Small-Cell Lung[Title/Abstract]) OR (Lung Carcinoma, Non-Small-Cell[Title/Abstract]) OR (Lung Carcinomas, Non-Small-Cell[Title/Abstract]) OR (Non-Small-Cell Lung Carcinomas[Title/Abstract]) OR (Nonsmall Cell Lung Cancer[Title/Abstract]) OR (Non-Small-Cell Lung Carcinoma[Title/Abstract]) OR (Non Small Cell Lung Carcinoma[Title/Abstract]) OR (Carcinoma, Non-Small Cell Lung[Title/Abstract]) OR (Non-Small Cell Lung Cancer[Title/Abstract]) |
| #3                      | #1 OR #2                                                                                                                                                                                                                                                                                                                                                                                                                                                                                                                    |
| #4                      | (checkpoint*[Title/Abstract]) OR ("checkpoint inhibitor"[Title/Abstract]) OR (CTLA-4[Title/Abstract]) OR (PD-1[Title/Abstract]) OR (PD-L1[Title/Abstract]) OR (ipilimumab[Title/Abstract]) OR (atezolizumab[Title/Abstract]) OR (durvalumab[Title/Abstract]) OR (pembrolizumab[Title/Abstract]) OR (nivolumab[Title/Abstract]) OR (avelumab[Title/Abstract]) OR (tremelimumab[Title/Abstract])                                                                                                                              |
| #5                      | (derived neutrophil-lymphocyte ratio[Title/Abstract]) OR (dNLR[Title/Abstract]) OR (derived neutrophil lymphocyte ratio[Title/Abstract]) OR (derived neutrophil to lymphocyte ratio[Title/Abstract])                                                                                                                                                                                                                                                                                                                        |
| #6                      | #3 AND #4 AND #5                                                                                                                                                                                                                                                                                                                                                                                                                                                                                                            |
| <b>Embase</b>           |                                                                                                                                                                                                                                                                                                                                                                                                                                                                                                                             |
| #1                      | 'non small cell lung cancer'/exp                                                                                                                                                                                                                                                                                                                                                                                                                                                                                            |
| #2                      | 'carcinoma, non small cell lung':ab,ti OR 'carcinomas, non-small-cell lung':ab,ti OR 'lung carcinoma, non-small-cell':ab,ti OR 'lung carcinomas, non-small-cell':ab,ti OR 'non-small-cell lung carcinomas ':ab,ti OR 'non small cell lung cancer':ab,ti OR 'non-small-cell lung carcinoma':ab,ti OR 'non small cell lung carcinoma ':ab,ti OR 'carcinoma, non-small cell lung':ab,ti OR 'non-small cell lung cancer':ab,ti                                                                                                  |
| #3                      | #1 OR #2                                                                                                                                                                                                                                                                                                                                                                                                                                                                                                                    |
| #4                      | 'checkpoint*':ab,ti OR 'checkpoint inhibitor':ab,ti OR 'ctla-4':ab,ti OR 'pd-1':ab,ti OR 'pd-l1':ab,ti OR 'ipilimumab':ab,ti OR 'atezolizumab':ab,ti OR 'durvalumab':ab,ti OR 'pembrolizumab':ab,ti OR 'nivolumab':ab,ti OR 'avelumab':ab,ti OR 'tremelimumab':ab,ti                                                                                                                                                                                                                                                        |
| #5                      | 'derived neutrophil-lymphocyte ratio':ab,ti OR 'dnlr':ab,ti OR 'derived neutrophil lymphocyte ratio':ab,ti OR 'derived neutrophil to lymphocyte ratio':ab,ti                                                                                                                                                                                                                                                                                                                                                                |
| #6                      | #3 AND #4 AND #5                                                                                                                                                                                                                                                                                                                                                                                                                                                                                                            |
| <b>Cochrane Library</b> |                                                                                                                                                                                                                                                                                                                                                                                                                                                                                                                             |
| #1                      | MeSH: Carcinoma, Non-Small-Cell Lung                                                                                                                                                                                                                                                                                                                                                                                                                                                                                        |

|                       |                                                                                                                                                                                                                                                                                                                                                                                                                                                        |
|-----------------------|--------------------------------------------------------------------------------------------------------------------------------------------------------------------------------------------------------------------------------------------------------------------------------------------------------------------------------------------------------------------------------------------------------------------------------------------------------|
| #2                    | (Carcinoma, Non Small Cell Lung):ti,ab,kw OR (Carcinomas, Non-Small-Cell Lung):ti,ab,kw OR (Lung Carcinoma, Non-Small-Cell):ti,ab,kw OR (Lung Carcinomas, Non-Small-Cell):ti,ab,kw OR (Non-Small-Cell Lung Carcinomas):ti,ab,kw OR (Non small Cell Lung Cancer):ti,ab,kw OR (Non-Small-Cell Lung Carcinoma):ti,ab,kw OR (Non Small Cell Lung Carcinoma):ti,ab,kw OR (Carcinoma, Non-Small Cell Lung):ti,ab,kw OR (Non-Small Cell Lung Cancer):ti,ab,kw |
| #3                    | #1 OR #2                                                                                                                                                                                                                                                                                                                                                                                                                                               |
| #4                    | (checkpoint*):ti,ab,kw OR (checkpoint inhibitor):ti,ab,kw OR (CTLA-4):ti,ab,kw OR (PD-1):ti,ab,kw OR (PD-L1):ti,ab,kw OR (ipilimumab):ti,ab,kw OR (atezolizumab):ti,ab,kw OR (durvalumab):ti,ab,kw OR (pembrolizumab):ti,ab,kw OR (nivolumab):ti,ab,kw OR (avelumab):ti,ab,kw OR (tremelimumab):ti,ab,kw                                                                                                                                               |
| #5                    | (derived neutrophil-lymphocyte ratio):ti,ab,kw OR (dNLR):ti,ab,kw OR (derived neutrophil lymphocyte ratio):ti,ab,kw OR (derived neutrophil to lymphocyte ratio):ti,ab,kw                                                                                                                                                                                                                                                                               |
| #6                    | #3 AND #4 AND #5                                                                                                                                                                                                                                                                                                                                                                                                                                       |
| <b>Web of science</b> |                                                                                                                                                                                                                                                                                                                                                                                                                                                        |
| #1                    | TS=(Carcinoma, Non-Small-Cell Lung OR Carcinoma, Non Small Cell Lung OR Carcinomas, Non-Small-Cell Lung OR Lung Carcinoma, Non-Small-Cell OR Lung Carcinomas, Non-Small-Cell OR Non-Small-Cell Lung Carcinomas OR Non small Cell Lung Cancer OR Non-Small-Cell Lung Carcinoma OR Non Small Cell Lung Carcinoma OR Carcinoma, Non-Small Cell Lung OR Non-Small Cell Lung Cancer)                                                                        |
| #2                    | TS=(checkpoint* OR checkpoint inhibitor OR CTLA-4 OR PD-1 OR PD-L1 OR ipilimumab OR atezolizumab OR durvalumab OR pembrolizumab OR nivolumab OR avelumab OR tremelimumab)                                                                                                                                                                                                                                                                              |
| #3                    | TS=(derived neutrophil-lymphocyte ratio OR DnLr OR derived neutrophil lymphocyte ratio OR derived neutrophil to lymphocyte ratio)                                                                                                                                                                                                                                                                                                                      |
| #4                    | #1 AND #2 AND #3                                                                                                                                                                                                                                                                                                                                                                                                                                       |
